# Supplementary material
Source: publisher figshare collection journal article supplement (https://acs.figshare.com/ndownloader/files/5941491)
Supplement: Supplementary file 1 [file 5941491]

Discovery of 8-Trifluoromethyl-3-cyclopropylmethyl-7-[(4-(2,4-difluorophenyl)-1-piperazinyl)methyl]-1,2,4-triazolo[4,3-a]pyridine (JNJ-46356479), a Selective and Orally Bioavailable mGlu2 receptor Positive Allosteric Modulator (PAM)

*Jose María Cid,<sup>a,\*</sup> Gary Tresadern,<sup>a</sup> Juan Antonio Vega,<sup>a</sup> Ana Isabel de Lucas,<sup>a</sup> Alcira del Cerro,<sup>a</sup> Encarnación Matesanz,<sup>a</sup> María Lourdes Linares,<sup>a</sup> Aránzazu García,<sup>a</sup> Laura Iturrino,<sup>a</sup> Laura Pérez-Benito,<sup>c</sup> Gregor J. Macdonald,<sup>b</sup> Daniel Oehlrich,<sup>b</sup> Hilde Lavreysen,<sup>b</sup> Luc Peeters,<sup>b</sup> Marc Ceusters,<sup>b</sup> Abdellah Ahnaou,<sup>b</sup> Wilhelmus Drinkenburg,<sup>b</sup> Claire Mackie,<sup>b</sup> Marijke Somers,<sup>b</sup> Andrés A. Trabanco<sup>a,\*</sup>*

<sup>a</sup>Janssen Research & Development, a division of Janssen-Cilag, S.A., Janssen-Cilag, Toledo, Spain.

<sup>b</sup>Janssen Research & Development, Janssen Pharmaceutica NV, Beerse, Belgium.

<sup>c</sup>Laboratori de Medicina Computacional Unitat de Bioestadística, Facultat de Medicina, Universitat Autònoma de Barcelona, Bellaterra, Spain.

Corresponding Author: \* To whom correspondence should be addressed. Tel: +34 925 245767.  
Fax: +34 925 245771. Email: [jcid@its.jnj.com](mailto:jcid@its.jnj.com). Tel: +34 925 245779. Fax: +34 925 245771.  
Email: [atrabanc@its.jnj.com](mailto:atrabanc@its.jnj.com).

## Supporting Information

### Contents

- Melting point methods
- LCMS methods
- Molecular Modeling

### **Melting points**

Values are peak values, and are obtained with experimental uncertainties that are commonly associated with this analytical method.

Mettler FP62 apparatus (A): For a number of compounds, melting points were determined in open capillary tubes on a Mettler FP62 apparatus. Melting points were measured with a temperature gradient of 1, 3, 5 or 10 °C/minute. Maximum temperature was 300 °C. The melting point was read from a digital display.

Mettler FP 81HT / FP90 apparatus (B): For a number of compounds, melting points were determined in open capillary tubes on a Mettler FP 81HT / FP90 apparatus. Melting points were measured with a temperature gradient of 1, 3, 5 or 10 °C/minute. Maximum temperature was 300 °C. The melting point was read from a digital display

### **LCMS**

#### General procedure

The High Performance Liquid Chromatography (HPLC) measurement was performed using a LC pump, a diode-array (DAD) or a UV detector and a column as specified in the respective methods. If necessary, additional detectors were included (see table of methods below).

Flow from the column was brought to the Mass Spectrometer (MS) which was configured with an atmospheric pressure ion source. It is within the knowledge of the skilled person to set the tune parameters (e.g. scanning range, dwell time...) in order to obtain ions allowing the identification of the compound's nominal monoisotopic molecular weight (MW) and/or exact mass monoisotopic molecular weight. Data acquisition was performed with appropriate software.

Compounds are described by their experimental retention times ( $R_t$ ) and ions. If not specified differently in the table of data, the reported molecular ion corresponds to the  $[M+H]^+$  (protonated molecule) and/or  $[M-H]^-$  (deprotonated molecule). In case the compound was not directly ionizable the type of adduct is specified (i.e.  $[M+NH_4]^+$ ,  $[M+HCOO]^-$ ,  $[M+CH_3COO]^-$  etc...). For molecules with multiple isotopic patterns (Br, Cl), the reported value is the one obtained for the lowest isotope mass. All results were obtained with experimental uncertainties that are commonly associated with the method used.

Hereinafter, "UPLC" means Ultra Performance Liquid Chromatography, "DAD" Diode Array Detector, "MSD" Mass Selective Detector, "SQD" Single Quadrupole Detector, "RT" room temperature, "BEH" bridged ethylsiloxane/silica hybrid.

**Table 1.** LC-MS Methods (Flow expressed in mL/min; column temperature (T) in °C; Run time in minutes).

| Compound                                                                  | Method | Instrument                                   | Column                                  | Mobile phase                                                                                                            | Gradient                                                                      | Flow<br>-----<br>Col T | Run<br>time |
|---------------------------------------------------------------------------|--------|----------------------------------------------|-----------------------------------------|-------------------------------------------------------------------------------------------------------------------------|-------------------------------------------------------------------------------|------------------------|-------------|
| 12, 13,<br>15, 16,<br>18, 19,<br>20, 21,<br>22, 23,<br>24, 25,<br>26, 27, | 1      | Waters:<br>Acquity®<br>UPLC® -DAD<br>and SQD | Waters: BEH<br>C18 (1.7µm,<br>2.1x50mm) | A: 95%<br>CH <sub>3</sub> CO <sub>2</sub> NH <sub>4</sub><br>6.5mM + 5%<br>CH <sub>3</sub> CN, B:<br>CH <sub>3</sub> CN | From 95% A to<br>40% A in<br>3.8min, to 5% A<br>in 0.8min, held<br>for 0.4min | 1<br>-----<br>50       | 5           |

| Compound | Method | Instrument                                           | Column                                               | Mobile phase                                                                                                                                         | Gradient                                                                                                                         | Flow<br>-----<br>Col T | Run<br>time |
|----------|--------|------------------------------------------------------|------------------------------------------------------|------------------------------------------------------------------------------------------------------------------------------------------------------|----------------------------------------------------------------------------------------------------------------------------------|------------------------|-------------|
| 28, 29   |        |                                                      |                                                      |                                                                                                                                                      |                                                                                                                                  |                        |             |
| 14       | 2      | Waters:<br>Acquity®<br>UPLC® -DAD<br>and SQD         | Waters: BEH<br>C18 (1.7µm,<br>2.1x50mm)              | A: 95%<br>CH <sub>3</sub> CO <sub>2</sub> NH <sub>4</sub><br>6.5mM + 5%<br>CH <sub>3</sub> CN, B:<br>CH <sub>3</sub> CN                              | From 95% A to<br>40% A in<br>2.8min, to 5% A<br>in 0.8min, held<br>for 0.2min, back<br>to 95% A in<br>0.2min, held for<br>1.0min | 1<br>-----<br>50       | 5           |
| 17       | 3      | Agilent:<br>HP1100-<br>DAD,<br>Micromass:<br>LCT TOF | Agilent:<br>Eclipse Plus<br>C18 (3.5µm,<br>2.1x30mm) | A: 95%<br>CH <sub>3</sub> CO <sub>2</sub> NH <sub>4</sub><br>6.5mM + 5%<br>CH <sub>3</sub> CN,<br>B: CH <sub>3</sub> CN +<br>CH <sub>3</sub> OH, 1/1 | 95% A for 0.2<br>min, to 0% A in<br>2.8min, held for<br>0.15min, back<br>to 95% A in<br>0.15min, held<br>for 1.7min              | 1<br>-----<br>60       | 5           |
| --       | 4      | Agilent:<br>HP1100-<br>DAD,<br>Waters: SQD           | Agilent:<br>Eclipse Plus<br>C18 (3.5µm,<br>2.1x30mm) | A: 95%<br>CH <sub>3</sub> CO <sub>2</sub> NH <sub>4</sub><br>6.5mM +<br>5% CH <sub>3</sub> CN,<br>B: CH <sub>3</sub> CN +<br>CH <sub>3</sub> OH, 1/1 | 95% A kept for<br>0.2 min, to 0% A<br>in 2.8min, held<br>for 0.15min,<br>back to 95% A in<br>0.15min, held<br>for 1.7min         | 1<br>-----<br>60       | 5           |
| --       | 5      | Waters:<br>Acquity®<br>UPLC® -DAD<br>and SQD         | Waters: BEH<br>C18 (1.7µm,<br>2.1x50mm)              | A: 95%<br>CH <sub>3</sub> CO <sub>2</sub> NH <sub>4</sub><br>6.5mM + 5%<br>CH <sub>3</sub> CN, B:<br>CH <sub>3</sub> CN                              | From 95% A to<br>40% A in<br>1.2min, to 5% A<br>in 0.6min, held<br>for 0.2min                                                    | 1<br>-----<br>50       | 2           |
| --       | 6      | Waters:<br>Acquity®<br>IClass UPLC®<br>-DAD and      | Waters: BEH<br>C18 (1.7µm,<br>2.1x50mm)              | A: 95%<br>CH <sub>3</sub> CO <sub>2</sub> NH <sub>4</sub><br>6.5mM + 5%<br>CH <sub>3</sub> CN, B:                                                    | From 95% A to<br>40 % A in<br>1.2min, to 5% A<br>in 0.6min, held                                                                 | 1<br>-----<br>50       | 2           |

| Compound | Method | Instrument | Column | Mobile phase       | Gradient   | Flow<br>-----<br>Col T | Run<br>time |
|----------|--------|------------|--------|--------------------|------------|------------------------|-------------|
|          |        | SQD        |        | CH <sub>3</sub> CN | for 0.2min |                        |             |

### Molecular Modeling

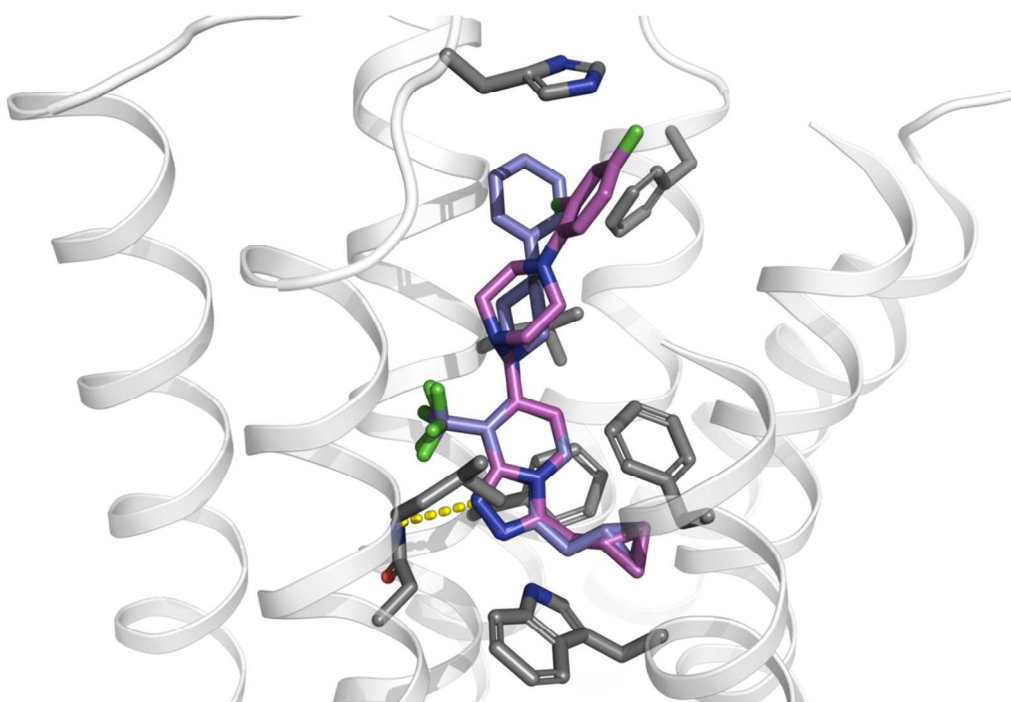

**Figure S1.** Comparison of the docking binding modes of **6** (purple) and **27** (magenta) in the mGlu2 receptor model. The figure shows the high structural overlap with most deviation occurring at the distal phenyl end of each molecule, towards the extracellular side of the receptor.
